# Supplementary material
Source: publisher figshare collection journal article supplement (https://sage.figshare.com/ndownloader/files/14150270)
Supplement: Supplementary file 1 [file 14150270]

# Supplementary material


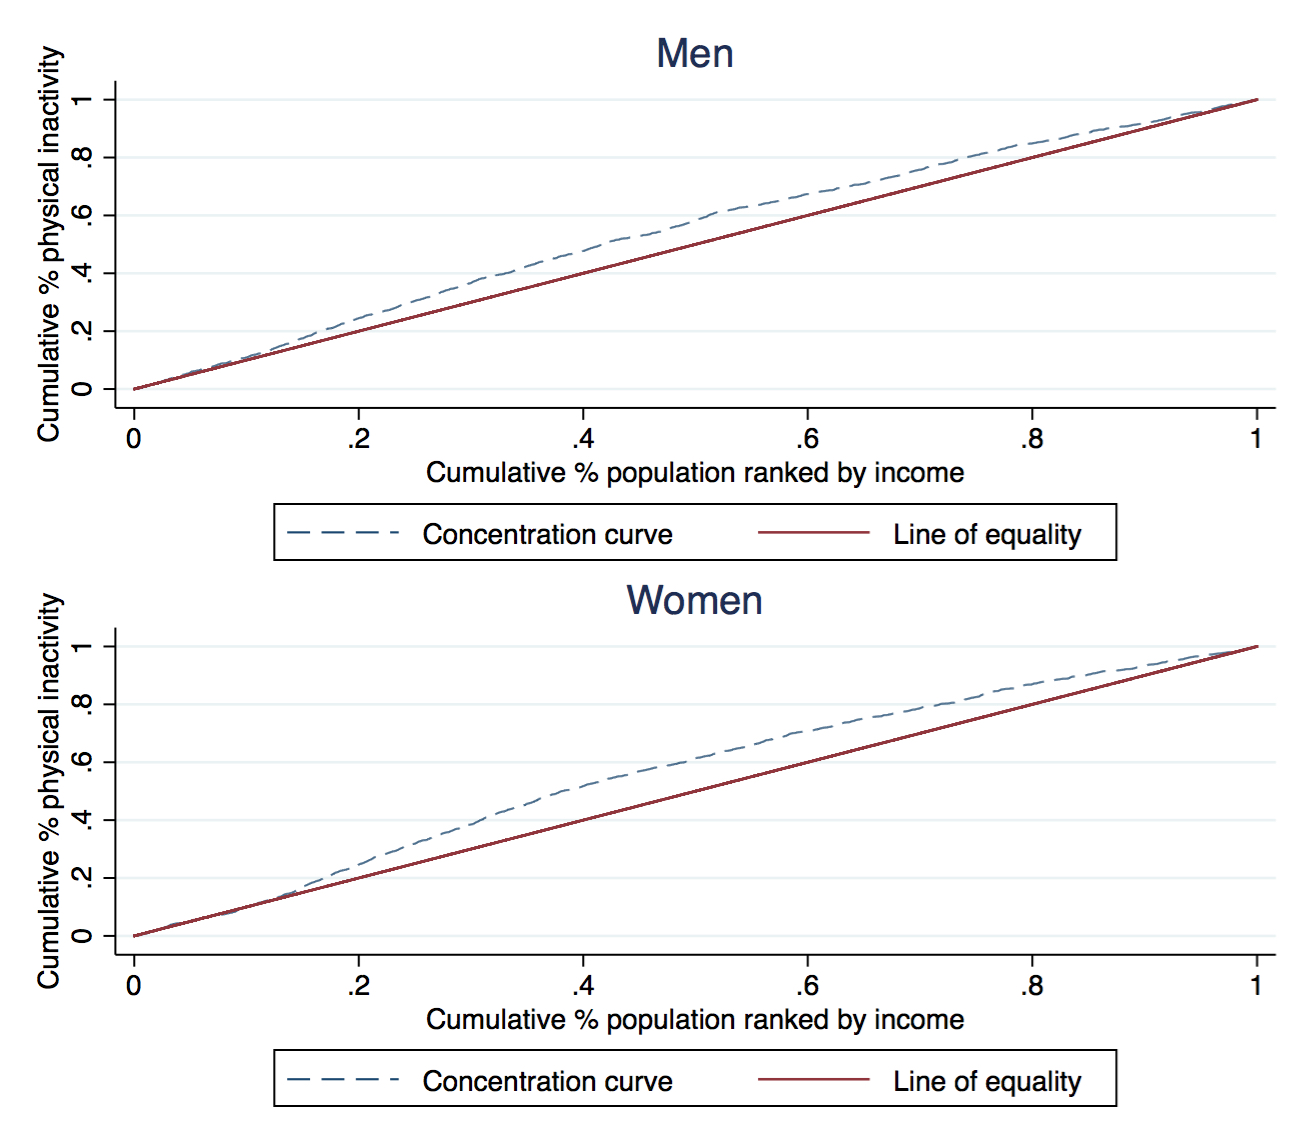


Figure 3. Concentration curve for cumulative physical inactivity by mean total income in 2014 for men and women.

Table 3. Summary of the gender stratified decomposition analysis: concentration index decomposed by factors measured in the HET survey 2014 in men and women

|  | Men | | | | | Women | | | | |
| --- | --- | --- | --- | --- | --- | --- | --- | --- | --- | --- |
|  | Coeff. | Elast. | CI | Cont. to C | | Coeff. | Elast. | CI | Cont. to C | |
| Abs. | Rel.(%) | Abs. | Rel.(%) |
| **Demographic variables (subtotal)** |  |  |  | **-0.006** | **5.2** |  |  |  | **0.002** | **-1.4** |
| Age | -0.001** | -0.364 | 0.009 | -0.003 | 2.8 | 0.001*** | 0.405 | 0.015 | 0.006 | -3.9 |
| Country of birth (ref:Sweden) |  |  |  |  |  |  |  |  |  |  |
| Not Sweden | 0.036* | 0.013 | -0.194 | -0.003 | 2.3 | 0.038** | 0.019 | -0.126 | -0.002 | 1.6 |
| Rurality (ref:urban) |  |  |  |  |  |  |  |  |  |  |
| Rural | -0.001 | -0.002 | 0.052 | -0.000 | 0.1 | -0.014 | -0.025 | 0.055 | -0.001 | 0.9 |
| **Socioeconomic factors (subtotal)** |  |  |  | **-0.003** | **2.5** |  |  |  | **-0.071** | **46.6** |
| Income quintiles (ref:5 highest) |  |  |  |  |  |  |  |  |  |  |
| 4 | -0.003 | -0.004 | 0.197 | -0.001 | 0.8 | 0.005 | 0.008 | 0.576 | 0.005 | -3.0 |
| 3 | 0.006 | 0.007 | -0.182 | -0.001 | 1.2 | 0.006 | 0.011 | 0.157 | 0.002 | -1.1 |
| 2 | 0.012 | 0.016 | -0.526 | -0.008 | 7.3 | 0.015 | 0.027 | -0.291 | -0.008 | 5.1 |
| 1 | 0.012 | 0.014 | -0.848 | -0.012 | 10.5 | 0.043** | 0.083 | -0.756 | -0.063 | 40.9 |
| Education (ref:high) |  |  |  |  |  |  |  |  |  |  |
| Middle | 0.020 | 0.546 | 0.077 | 0.004 | -3.7 | 0.016 | 0.040 | 0.056 | 0.002 | -1.5 |
| Low | 0.038*** | 0.149 | -0.126 | -0.019 | 16.7 | 0.031** | 0.113 | -0.197 | -0.022 | 14.6 |
| Labour market position (ref:working) |  |  |  |  |  |  |  |  |  |  |
| Studying | -0.059*** | -0.024 | -0.754 | 0.018 | -15.8 | -0.016 | -0.009 | -0.595 | 0.005 | -3.6 |
| Retired | -0.021 | -0.048 | -0.162 | 0.008 | -7.0 | -0.011 | -0.023 | -0.196 | 0.004 | -2.9 |
| Unemployed | -0.025 * | -0.028 | -0.302 | 0.008 | -7.4 | -0.007 | -0.012 | -0.244 | 0.003 | -1.9 |
| **Material resources(subtotal)** |  |  |  | **-0.015** | **13.1** |  |  |  | **-0.016** | **10.4** |
| Low cash margin (ref:no) |  |  |  |  |  |  |  |  |  |  |
| Yes, not able to get 15,000 SEK | 0.045*** | 0.041 | -0.411 | -0.017 | 15.2 | 0.036*** | 0.050 | -0.260 | -0.013 | 8.5 |
| Difficulties to make ends meet (ref:no) |  |  |  |  |  |  |  |  |  |  |
| Yes | -0.011 | -0.007 | -0.306 | 0.002 | -2.0 | 0.020 | 0.019 | -0.157 | -0.003 | 1.9 |
| **Family conditions (subtotal)** |  |  |  | **-0.011** | **9.6** |  |  |  | **0.006** | **-3.9** |
| Civil status (ref:married/cohabitating) |  |  |  |  |  |  |  |  |  |  |
| Unmarried/not cohabitating | 0.020 * | 0.032 | -0.356 | -0.011 | 10.2 | 0.014 | 0.017 | -0.302 | -0.005 | 3.3 |
| Divorced | 0.056*** | 0.024 | -0.065 | -0.002 | 1.4 | -0.004 | -0.002 | 0.071 | 0.000 | 0.1 |
| Widower | 0.018 | 0.003 | -0.188 | -0.001 | 0.5 | 0.013 | 0.007 | -0.102 | -0.001 | 0.5 |
| Children in household (ref:no) |  |  |  |  |  |  |  |  |  |  |
| yes | 0.006 | 0.009 | 0.318 | 0.003 | -2.6 | 0.024** | 0.049 | 0.240 | 0.012 | -7.7 |
| **Functional limitations (subtotal)** |  |  |  | **-0.044** | **39.1** |  |  |  | **-0.040** | **25.9** |
| Long term health problem (ref:no) |  |  |  |  |  |  |  |  |  |  |
| Yes, doesn't affect workability | 0.040*** | 0.031 | 0.121 | 0.004 | -3.4 | 0.037** | 0.024 | 0.124 | 0.003 | -2.0 |
| Yes, effects workability to some extent | 0.014 | 0.025 | -0.055 | -0.001 | 1.2 | 0.016* | 0.030 | -0.081 | -0.002 | 1.6 |
| Yes, effects workability to great extent | 0.097 *** | 0.070 | -0.234 | -0.016 | 14.6 | 0.090*** | 0.064 | -0.179 | -0.011 | 7.5 |
| Mobility difficulties (ref:no) |  |  |  |  |  |  |  |  |  |  |
| Yes | 0.157*** | 0.153 | -0.195 | -0.030 | 26.6 | 0.152*** | 0.159 | -0.181 | -0.029 | 18.8 |
| **Psychosocial conditions (subtotal)** |  |  |  | **-0.014** | **12.3** |  |  |  | **-0.007** | **4.8** |
| Psychological distress (ref:no) |  |  |  |  |  |  |  |  |  |  |
| Yes | 0.064*** | 0.093 | -0.132 | -0.012 | 10.9 | 0.042*** | 0.084 | -0.079 | -0.007 | 4.4 |
| Fear of crime (ref:no) |  |  |  |  |  |  |  |  |  |  |
| yes | 0.037 * | 0.010 | -0.161 | -0.002 | 1.4 | 0.004 | 0.007 | -0.095 | -0.001 | 0.4 |
| **Inequality(total)** |  |  |  | **-0.112** | **100** |  |  |  | **-0.153** | **100** |
| **Inequality(explained)** |  |  |  | **-0.092** | **81.8** |  |  |  | **-0.126** | **82.5** |
| **Residual** |  |  |  | **-0.020** | **18.2** |  |  |  | **-0.027** | **17.5** |

a: *Coeff:* marginal effects from the probit model; *Elast:* elasticity; *CI:* Concentration index of the determinants; *Cont to C:* Contribution to the total inequality(total); *Abs:* Absolute contribution; *Rel (%):* Relative contribution calculated on the overall explained proportion of inequality(total).

b: * indicates<p 0.05; ** indicates p<0.01; *** indicates p<0.001


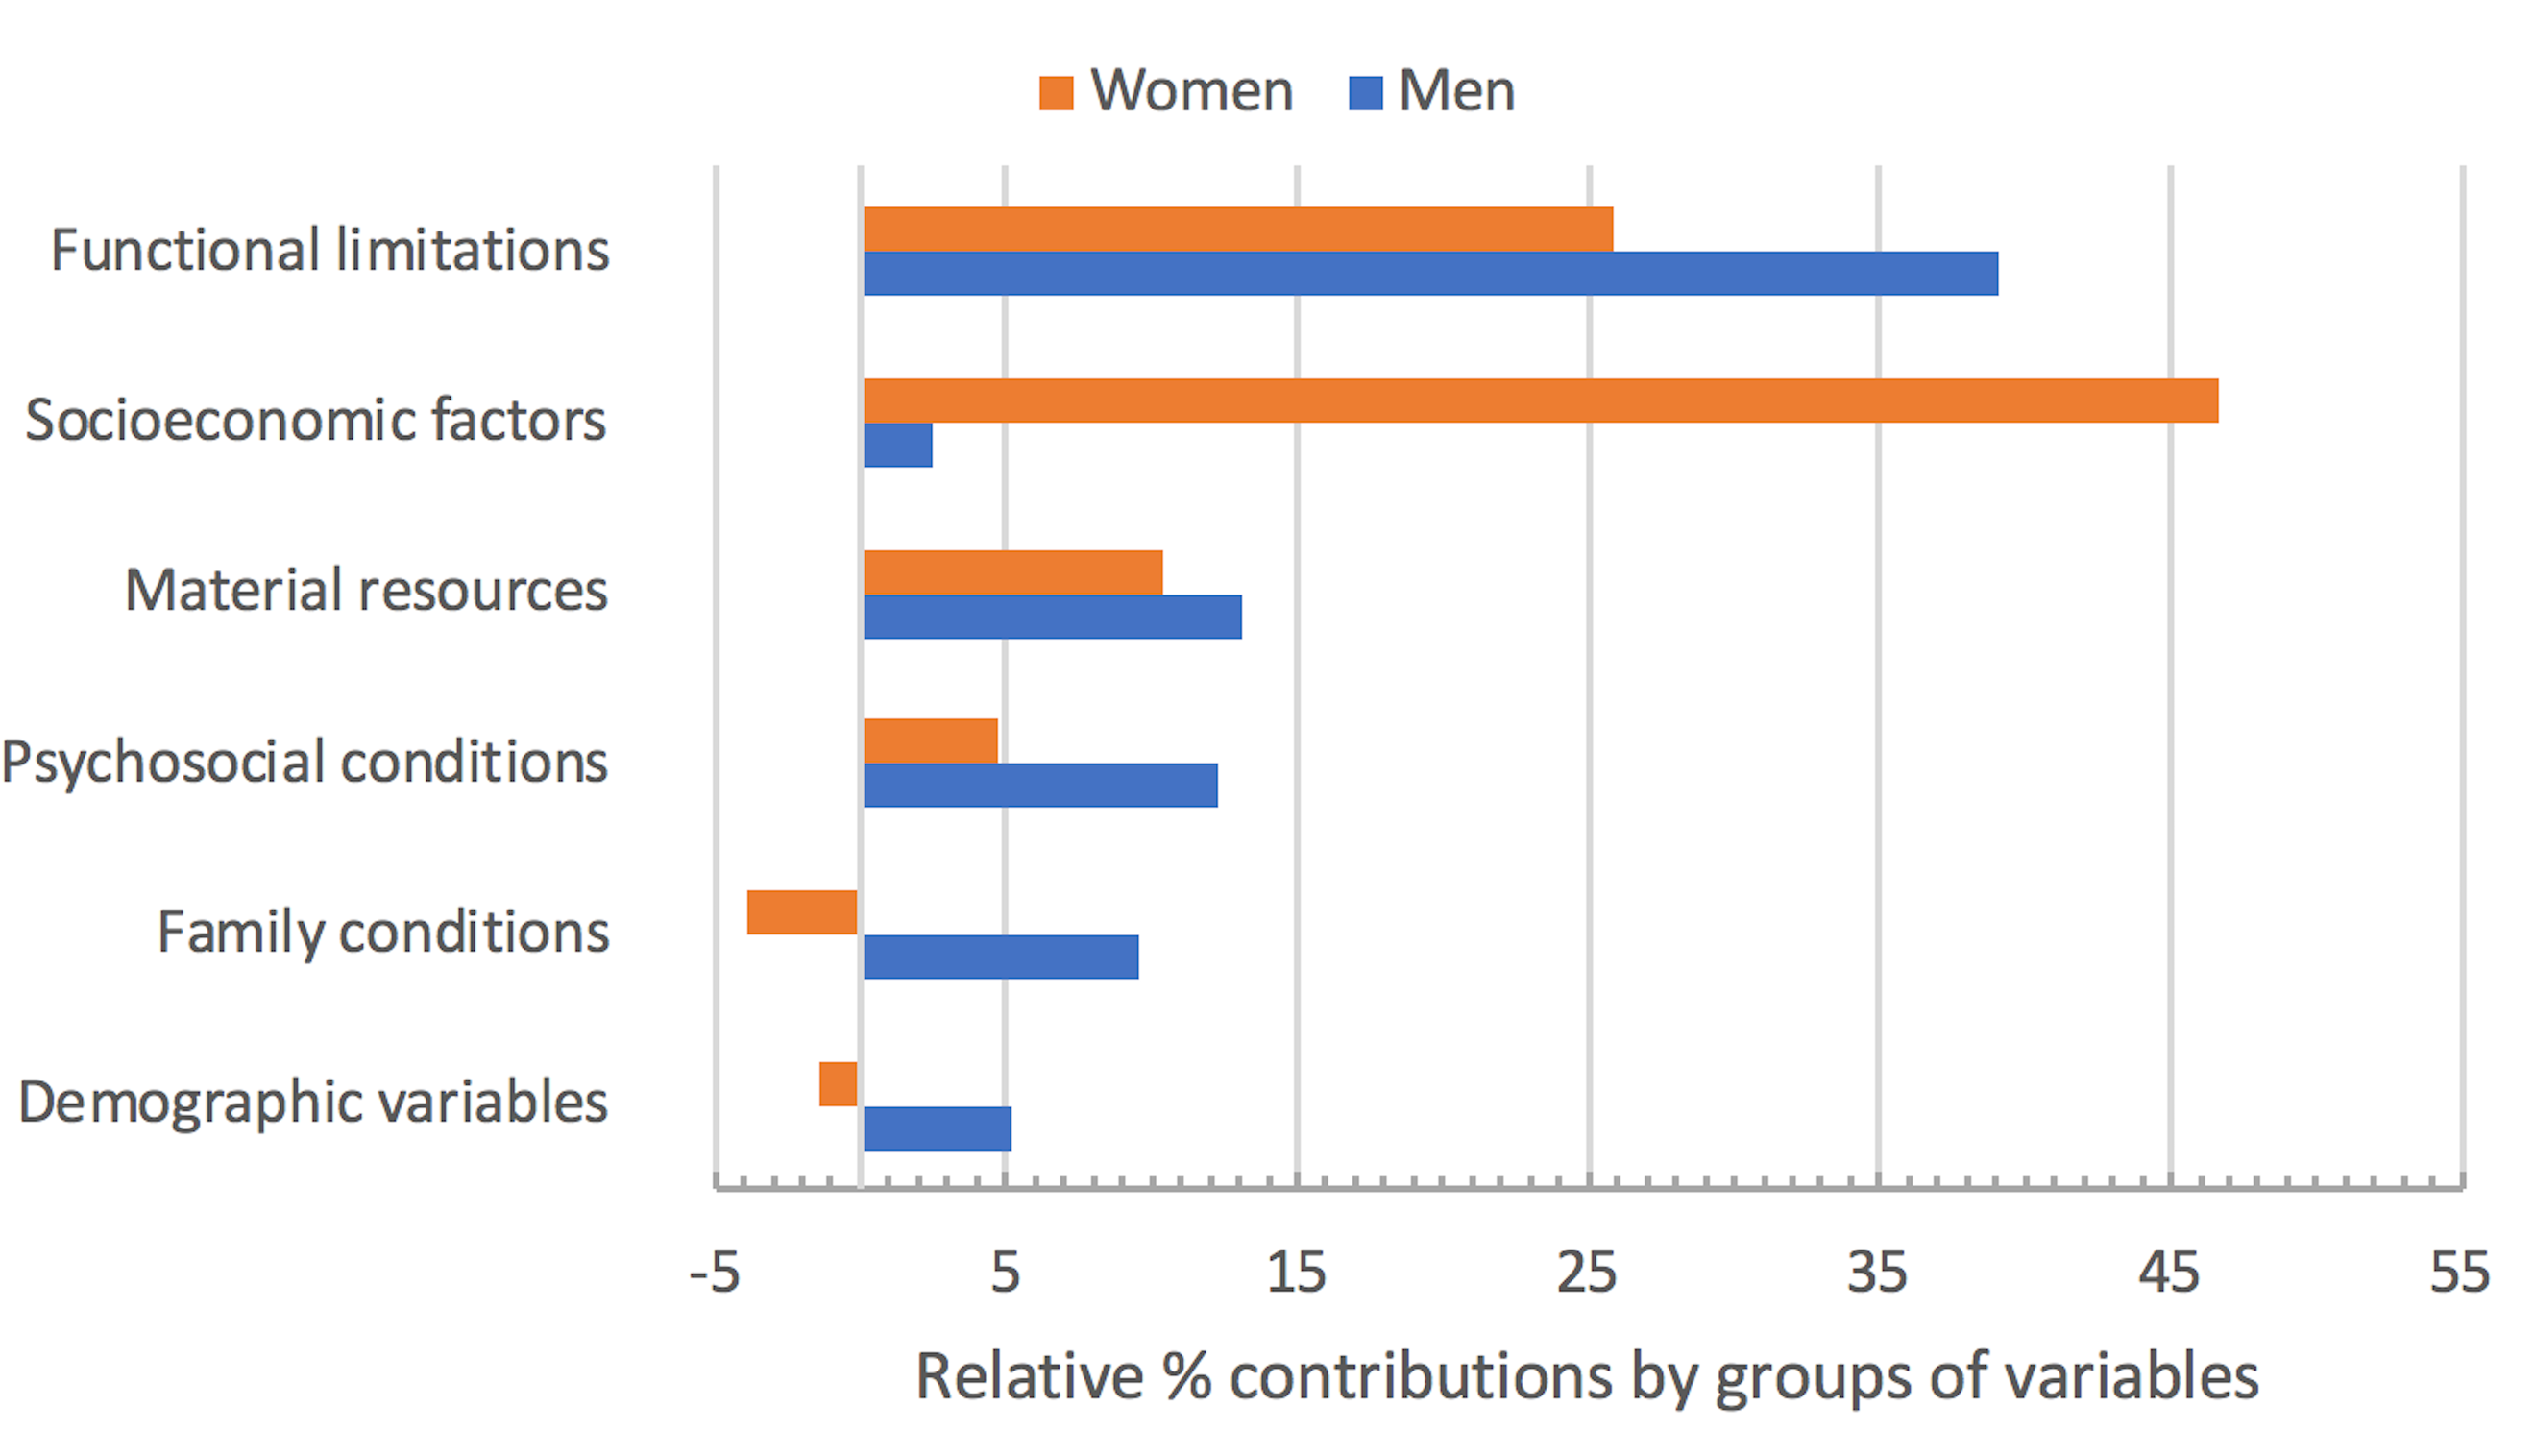
Figure 4. Relative % contributions of the groups of variables used in the gender stratified decomposition analyses
